# Supplementary material
Source: PubMed Central journal article supplement (PMC3387391)

## Supplemental Figure

Figure 1: The rate of proliferation of Ishikawa cells following gain-of function of miR-98 or miR-181a (pre-miR-transfected) as compared to pre-miR negative control#1 (preNC). The results presented as mean  $\pm$  SEM of three independent experiments performed in duplicates and analyzed using non-parametric student t-test. \* ( $p < 0.05$ ) significantly different from preNC.

Figure 1

Supplementary figure

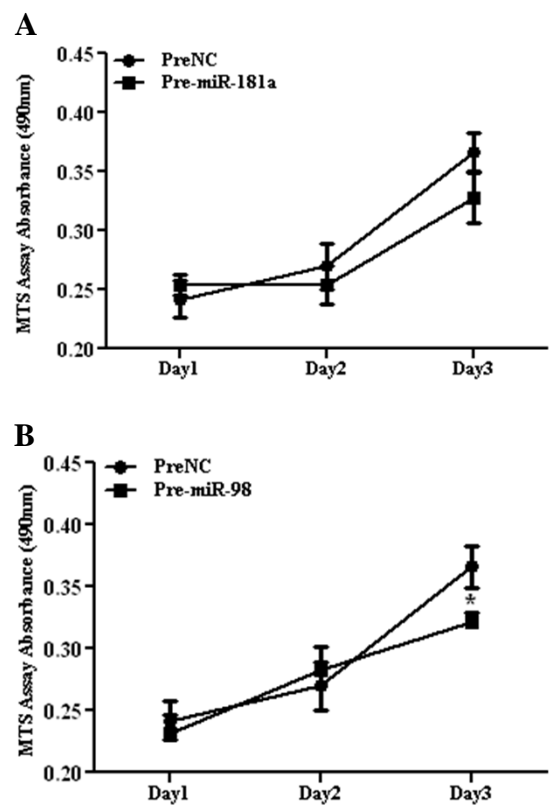

Supplement: supp_jc.2012-1018_12-1018_Supp_Figure.pdf [file supp_jc.2012-1018_12-1018_Supp_Figure.pdf]
